# Supplementary material for: Impacts of urban built environment on empty taxi trips using limited geolocation data
Source: Springer Nature journal article supplement (doi:10.1007/s11116-016-9709-3), 2016-05-27
Supplement: MOESM1 [file 10910744]

## Sheet: Sheet2
Supplementary Material for
Effects of Urban Built Environment on Empty Taxi Trips Using Limited Geolocation Data
in Transporation
Wenbo Zhang, Satish V. Ukkusuri, Jian John Lu
Corresponding author: Satish V. Ukkusuri, Lyles School of Civil Engineering, Purdue University, sukkusur@purdue.edu
Table S.1 Pearson Product-Moment Factors of Potential Independent Variables
	DIST	AT	OPD	OER	OAAI	OCA	ORA	OOA	ODR	ODBR	OGR	OSS	OTS	OPF	ORS	OBR	OCBS	OLBS	OPS	DPD	DER	DAAI	DCA	DRA	DOA	DDR	DDBR	DGR	DSS	DTS	DPF	DRS	DBR	DCBS	DLBS	DPS
DIST	1	-	-	-	-	-	-	-	-	-	-	-	-	-	-	-	-	-	-	-	-	-	-	-	-	-	-	-	-	-	-	-	-	-	-	-
AT	0.253717	1	-	-	-	-	-	-	-	-	-	-	-	-	-	-	-	-	-	-	-	-	-	-	-	-	-	-	-	-	-	-	-	-	-	-
OPD	-0.143681	-0.27	1	-	-	-	-	-	-	-	-	-	-	-	-	-	-	-	-	-	-	-	-	-	-	-	-	-	-	-	-	-	-	-	-	-
OER	0.0537467	0.39836	-0.507383	1	-	-	-	-	-	-	-	-	-	-	-	-	-	-	-	-	-	-	-	-	-	-	-	-	-	-	-	-	-	-	-	-
OAAI	-0.173423	-0.3	0.502876	-0.314091	1	-	-	-	-	-	-	-	-	-	-	-	-	-	-	-	-	-	-	-	-	-	-	-	-	-	-	-	-	-	-	-
OCA	-0.08011	-0.138405	-0.465966	0.490343	-0.260703	1	-	-	-	-	-	-	-	-	-	-	-	-	-	-	-	-	-	-	-	-	-	-	-	-	-	-	-	-	-	-
ORA	-0.162035	-0.251497	0.913095	-0.378624	0.652786	-0.339589	1	-	-	-	-	-	-	-	-	-	-	-	-	-	-	-	-	-	-	-	-	-	-	-	-	-	-	-	-	-
OOA	-0.051024	-0.0984294	-0.444575	0.534411	-0.265414	0.973184	-0.326327	1	-	-	-	-	-	-	-	-	-	-	-	-	-	-	-	-	-	-	-	-	-	-	-	-	-	-	-	-
ODR	-0.0499485	-0.0889841	-0.299631	0.546593	-0.378526	0.630641	-0.239161	0.682261	1	-	-	-	-	-	-	-	-	-	-	-	-	-	-	-	-	-	-	-	-	-	-	-	-	-	-	-
ODBR	-0.0919635	-0.229916	-0.258342	0.148928	0.0263002	0.271402	-0.269639	0.222798	0.17461	1	-	-	-	-	-	-	-	-	-	-	-	-	-	-	-	-	-	-	-	-	-	-	-	-	-	-
OGR	-0.00702399	-0.020914	0.0136701	0.0842034	-0.0293333	0.123363	0.0470905	0.143074	0.31201	-0.118747	1	-	-	-	-	-	-	-	-	-	-	-	-	-	-	-	-	-	-	-	-	-	-	-	-	-
OSS	-0.0632139	-0.120507	-0.124285	0.0375368	0.0825652	0.206892	-0.0967039	0.12278	-0.0794898	0.0191023	-0.0657246	1	-	-	-	-	-	-	-	-	-	-	-	-	-	-	-	-	-	-	-	-	-	-	-	-
OTS	-0.0307392	-0.0255458	-0.210908	0.314966	-0.220145	-0.0836429	-0.21418	-0.052584	0.166851	0.02644	-0.0282589	-0.0559539	1	-	-	-	-	-	-	-	-	-	-	-	-	-	-	-	-	-	-	-	-	-	-	-
OPF	-0.0857641	-0.201508	0.772626	-0.471738	0.359981	-0.490757	0.62663	-0.468371	-0.256647	-0.254776	0.0126314	-0.116254	-0.135468	1	-	-	-	-	-	-	-	-	-	-	-	-	-	-	-	-	-	-	-	-	-	-
ORS	-0.0495598	-0.0843737	0.0413795	0.116445	0.0347059	0.178039	0.0925516	0.199779	0.17168	-0.0900611	-0.0195123	0.0218901	-0.0510548	7.2348e-05	1	-	-	-	-	-	-	-	-	-	-	-	-	-	-	-	-	-	-	-	-	-
OBR	-0.134304	-0.1908	0.254368	-0.330209	0.212511	-0.190472	0.106977	-0.231263	-0.204344	0.103783	-0.0852314	0.262027	-0.105859	0.299094	0.061434	1	-	-	-	-	-	-	-	-	-	-	-	-	-	-	-	-	-	-	-	-
OCBS	-0.1204	-0.22891	-0.0255024	0.210597	-0.0511185	0.509576	0.0176223	0.517817	0.343394	0.0388926	-0.0625433	0.156878	0.0846991	-0.0640254	0.409659	0.0200847	1	-	-	-	-	-	-	-	-	-	-	-	-	-	-	-	-	-	-	-
OLBS	-0.113127	-0.200908	-0.120309	0.261302	-0.0662195	0.614256	-0.0213693	0.587546	0.401481	0.316497	0.107177	0.0791896	-0.109647	-0.217817	0.279998	-0.0466505	0.656431	1	-	-	-	-	-	-	-	-	-	-	-	-	-	-	-	-	-	-
OPS	-0.161017	-0.204559	0.0707915	-0.0235677	0.185519	0.43819	0.214111	0.378289	-0.00839793	0.0183612	0.0958789	0.0832335	-0.147074	-0.158034	-0.0210336	-0.0378891	0.174804	0.255765	1	-	-	-	-	-	-	-	-	-	-	-	-	-	-	-	-	-
DPD	-0.0417979	-0.185724	0.606506	-0.288885	0.281685	-0.250948	0.568736	-0.221832	-0.0666534	-0.16107	0.0655718	-0.12783	-0.157364	0.488996	0.0397009	0.0686102	0.00358886	-0.0520724	0.0108188	1	-	-	-	-	-	-	-	-	-	-	-	-	-	-	-	-
DER	0.0415288	0.238328	-0.292463	0.45231	-0.131516	0.209661	-0.213255	0.215895	0.161347	0.0538497	-0.0123236	0.0146599	0.165147	-0.286587	0.0164168	-0.183525	0.0577156	0.0973433	0.0456965	-0.529395	1	-	-	-	-	-	-	-	-	-	-	-	-	-	-	-
DAAI	-0.100158	-0.248173	0.322411	-0.132689	0.51173	-0.0765236	0.407687	-0.0649675	-0.049915	0.0141487	0.0508224	0.0396763	-0.134073	0.251078	0.0680706	0.0766764	0.0464692	0.0199558	0.0797785	0.512925	-0.374147	1	-	-	-	-	-	-	-	-	-	-	-	-	-	-
DCA	-0.0939587	-0.11203	-0.263076	0.235995	-0.0689753	0.49188	-0.179101	0.456442	0.231686	0.185971	0.00453367	0.140545	-0.0190331	-0.295055	0.0746902	-0.0763427	0.262723	0.365357	0.263635	-0.472159	0.409687	-0.239821	1	-	-	-	-	-	-	-	-	-	-	-	-	-
DRA	-0.0587974	-0.174805	0.574264	-0.209923	0.370989	-0.172182	0.641276	-0.147314	-0.0204648	-0.183979	0.0994658	-0.136897	-0.158964	0.421155	0.060995	-0.0484094	0.0239064	0.0110161	0.11482	0.91678	-0.410292	0.651571	-0.355918	1	-	-	-	-	-	-	-	-	-	-	-	-
DOA	-0.0726569	-0.079804	-0.243457	0.252469	-0.063274	0.462881	-0.162555	0.450868	0.243968	0.161383	0.011487	0.109763	-0.0175192	-0.279372	0.0771964	-0.107365	0.256259	0.339947	0.212438	-0.449391	0.46791	-0.238704	0.970386	-0.338417	1	-	-	-	-	-	-	-	-	-	-	-
DDR	-0.0533134	-0.0694077	-0.084415	0.168348	-0.0580405	0.227115	-0.0320206	0.233027	0.258251	0.0647498	0.0498889	-0.00573821	0.0945247	-0.116763	0.0489288	-0.0966655	0.152005	0.175834	0.0863692	-0.290105	0.533823	-0.374607	0.573711	-0.233311	0.638006	1	-	-	-	-	-	-	-	-	-	-
DDBR	-0.0869615	-0.168279	-0.174212	0.0794422	0.0309937	0.166638	-0.191729	0.139807	0.0522822	0.3941	-0.0557612	0.10598	0.0632675	-0.157028	0.0176982	0.146669	0.0672016	0.116255	0.0530256	-0.296204	0.131593	-0.00824854	0.271596	-0.324091	0.227734	0.174612	1	-	-	-	-	-	-	-	-	-
DGR	0.00176755	-0.0142021	0.0643138	-0.00932423	0.0427144	0.00712078	0.0976306	0.0136229	0.047572	-0.0520818	0.160942	-0.0375333	-0.0249662	0.0415753	0.00499325	-0.0563176	-0.00576787	0.0277881	0.046578	0.0304877	0.0709071	-0.0167169	0.121566	0.0667511	0.151884	0.325036	-0.130415	1	-	-	-	-	-	-	-	-
DSS	-0.0440944	-0.0862558	-0.125741	0.0295922	0.0504038	0.126025	-0.128939	0.100619	0.0010758	0.100157	-0.0345445	0.331514	-0.00990448	-0.0866388	0.0254178	0.159518	0.0874928	0.060516	0.00524099	-0.169215	0.0475493	0.0492948	0.261655	-0.13521	0.176225	-0.0550247	0.0202788	-0.0673196	1	-	-	-	-	-	-	-
DTS	-0.0332561	-0.0250234	-0.157575	0.11886	-0.109446	0.00689758	-0.155615	-0.00404346	0.0593441	0.0492125	-0.025184	0.00473417	0.367813	-0.114672	-0.0302574	-0.0260576	0.0164059	-0.0319168	-0.00187187	-0.267228	0.40472	-0.306363	-0.11425	-0.269101	-0.0729556	0.243641	0.0332692	-0.0325244	-0.0737039	1	-	-	-	-	-	-
DPF	-0.00545526	-0.141529	0.481111	-0.281264	0.217992	-0.282588	0.413765	-0.25905	-0.101122	-0.151646	0.0433253	-0.0920297	-0.106712	0.559409	0.0145666	0.137813	-0.0301846	-0.122336	-0.0908949	0.779378	-0.490966	0.398438	-0.493795	0.655369	-0.47641	-0.252681	-0.295584	0.0284867	-0.125059	-0.183675	1	-	-	-	-	-
DRS	-0.0373617	-0.0686874	0.0458249	0.0287642	0.0744117	0.0694484	0.0677783	0.0726579	0.0457829	0.0141544	0.00398904	0.0348951	-0.0311896	0.019445	0.198238	0.0398438	0.120412	0.0961835	0.0413678	0.0586854	0.0837764	0.0615756	0.180195	0.0993157	0.208143	0.146467	-0.0774007	-0.0198499	0.0223123	-0.0720565	0.0220847	1	-	-	-	-
DBR	-0.0653161	-0.151051	0.0933582	-0.197744	0.0658415	-0.0965975	-0.0392248	-0.120137	-0.105187	0.13733	-0.0567816	0.178042	-0.0368321	0.157974	0.0285845	0.652872	0.025503	-0.0363924	-0.0824162	0.214941	-0.372078	0.176549	-0.172486	0.0464505	-0.214469	-0.21983	0.117294	-0.095047	0.257081	-0.145291	0.307959	0.0656543	1	-	-	-
DCBS	-0.091959	-0.180586	-0.00412304	0.0668048	0.0422111	0.246386	0.0139615	0.237832	0.143571	0.0859728	-0.00887744	0.104155	0.0273618	-0.0317666	0.102996	0.0294645	0.352798	0.282268	0.118418	-0.0341803	0.178781	-0.0492518	0.471894	0.0028478	0.487201	0.327807	0.0110199	-0.0714215	0.223042	0.117172	-0.0584772	0.434159	0.0246016	1	-	-
DLBS	-0.0997962	-0.15566	-0.0445372	0.111265	0.0241393	0.357657	0.0162833	0.330714	0.177092	0.138334	0.0230211	0.0763931	-0.0577363	-0.118723	0.0951515	-0.0102894	0.304976	0.423275	0.254286	-0.0967502	0.174327	-0.0223167	0.638122	-0.00751073	0.617911	0.355949	0.243878	0.105528	0.148905	-0.143483	-0.196149	0.300822	-0.0279083	0.667024	1	-
DPS	-0.128494	-0.166892	0.0397694	0.041013	0.0960194	0.27427	0.14642	0.221117	0.0842908	0.0592784	0.0413912	0.0175873	-0.055557	-0.0737094	0.0473372	-0.0544369	0.143428	0.278897	0.461808	0.0720916	-0.0760258	0.189542	0.420669	0.211768	0.348099	-0.0514425	0.0157104	0.0996234	0.0888055	-0.204066	-0.160857	-0.0093996	-0.0756997	0.121559	0.327706	1
